# Supplementary material for: Co(OH)2 Nanoflowers Decorated α-NiMoO4 Nanowires as a Bifunctional Electrocatalyst for Efficient Overall Water Splitting
Source: MDPI journal article supplement (doi:10.3390/catal12111417), 2022-11-11
Supplement: s1 [file s1]

Archive with 1 entries (1 files):
- catalysts-1984306-supplementary.pdf
