# Supplementary material for: Co(OH)2 Nanoflowers Decorated α-NiMoO4 Nanowires as a Bifunctional Electrocatalyst for Efficient Overall Water Splitting
Source: MDPI journal article supplement (doi:10.3390/catal12111417), 2022-11-11
Supplement: s1 [file s1 › catalysts-1984306-supplementary.pdf]

## Supplementary Materials

# Co(OH)<sub>2</sub> Nanoflowers Decorated $\alpha$ -NiMoO<sub>4</sub> Nanowires as a Bifunctional Electrocatalyst for Efficient Overall Water Splitting

Zhiying Xu <sup>1</sup>, Minghui Hao <sup>1</sup>, Xin Liu <sup>2</sup>, Jingjing Ma <sup>3</sup>, Liang Wang <sup>1</sup>, Chunhu Li <sup>1</sup> and Wentai Wang <sup>1,\*</sup>

<sup>1</sup> Key Laboratory of Marine Chemistry Theory and Technology, Ministry of Education, College of Chemistry and Chemical Engineering, Ocean University of China, Qingdao 266100, China

<sup>2</sup> Institute for New Energy Materials and Low-Carbon Technologies, Tianjin University of Technology, Tianjin 300384, China

<sup>3</sup> State Key Laboratory of High-Efficiency Utilization of Coal and Green Chemical Engineering, Ningxia University, Yinchuan 750021, China

\* Correspondence: wangwentai@ouc.edu.cn

The XRD of Co(OH)<sub>2</sub>/CC was also collected to analysis the material composition. As shown in Figure S1, all the diffraction peaks of the prepared Co(OH)<sub>2</sub>/CC match well with the standard card JCPDS#46-0605, which indicates the prepared Co(OH)<sub>2</sub>/CC is  $\alpha$ -Co(OH)<sub>2</sub>/CC. The diffraction peaks of  $\alpha$ -Co(OH)<sub>2</sub>/CC at 11.54°, 33.54°, 34.47°, 38.96°, 46.31°, 59.81°, 61.16°, 65.03° and 70.84° are corresponded to the characteristic peaks of (003), (100), (102), (105), (108), (110), (113), (116) and (202) crystal planes, respectively. Moreover, the (111) crystal plane of C corresponding to the diffraction peak at 30.55° is consistent with the standard card JCPDS#75-2078, indicating that  $\alpha$ -Co(OH)<sub>2</sub>/CC has been successfully synthesized.

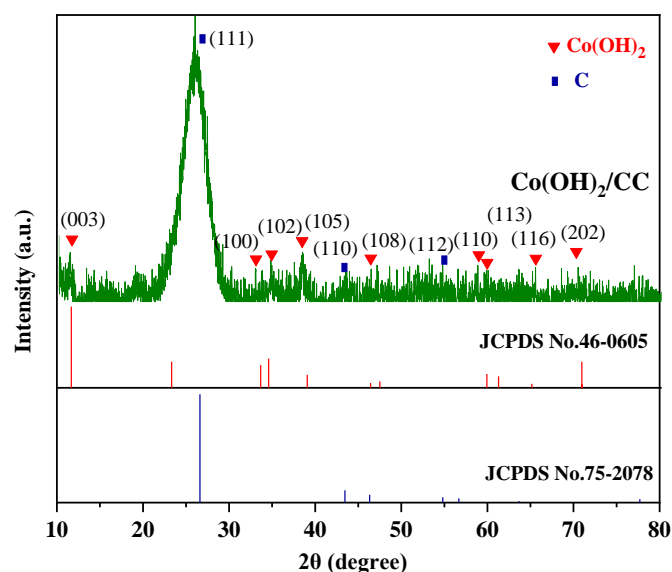

**Figure S1.** XRD pattern of  $\text{Co(OH)}_2/\text{CC}$

According to the LSV curves in Figure S2, the  $\text{Co(OH)}_2/\alpha\text{-NiMoO}_4$  NWs/CC electrode shows the lowest overpotential of 183.01 mV at the current density of  $10 \text{ mA cm}^{-2}$ , which is 149.92 mV and 223.10 mV less than  $\alpha\text{-NiMoO}_4$  NWs/CC and  $\text{Co(OH)}_2/\text{CC}$ , respectively. It can be concluded that  $\text{Co(OH)}_2/\alpha\text{-NiMoO}_4$  NWs/CC electrode requires the lowest overpotential and has the best performance of electrocatalytic hydrogen evolution at the same current density.

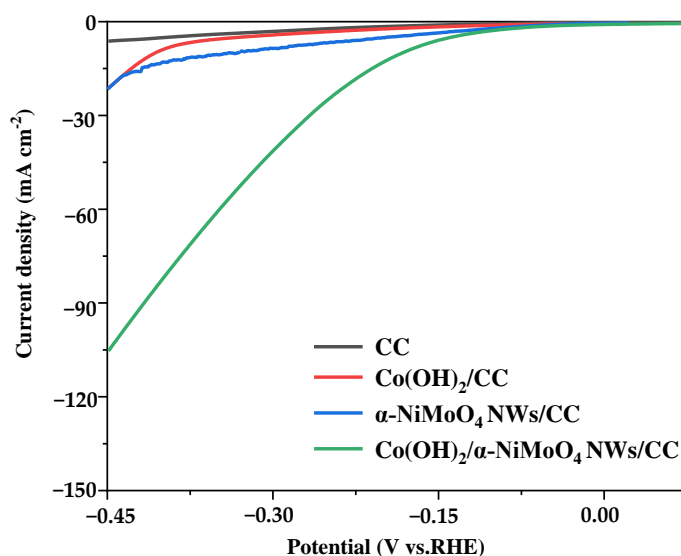

**Figure S2.** LSV curves of different catalysts for HER

According to the LSV curves in Figure S3, bare carbon cloth still has no OER activity at higher current densities. The  $\text{Co(OH)}_2/\alpha\text{-NiMoO}_4$  NWs/CC electrode shows the lowest overpotential of 170.26 mV at the current density of  $10 \text{ mA cm}^{-2}$ , which is 109.87 mV and 267.74 mV less than  $\alpha\text{-NiMoO}_4$  NWs/CC and  $\text{Co(OH)}_2/\text{CC}$ , respectively. It can be concluded that  $\text{Co(OH)}_2/\alpha\text{-NiMoO}_4$  NWs/CC electrode requires the lowest overpotential and has the best performance of electrocatalytic oxygen evolution at the same current density.

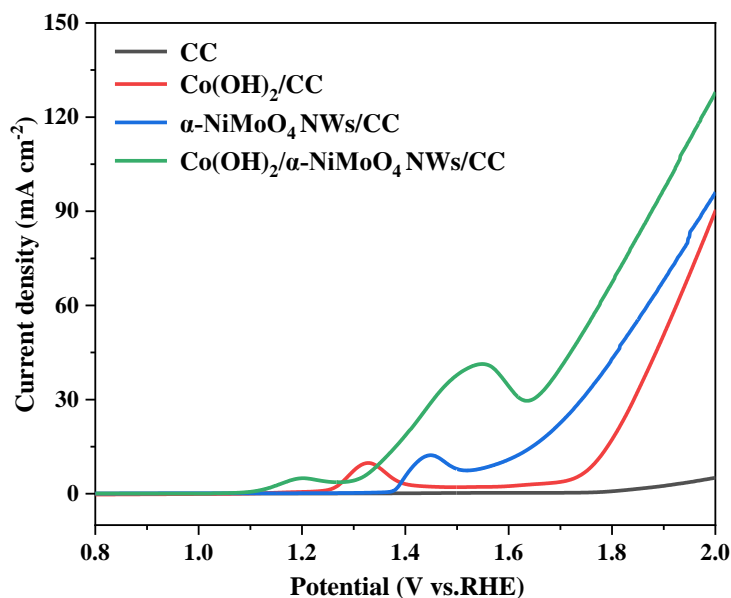

**Figure S3.** LSV curves of different catalysts for OER
